# Supplementary material
Source: ML conference proceedings conference paper supplement (https://proceedings.mlr.press/v70/imaizumi17a.html)
Supplement: Supplementary file [file imaizumi17a-supp.pdf]

## A. Supplementary materials

### A.1. Notation and Lemmas

We provide some additional notations for the proof. First, for  $X \in \mathcal{X}$ , we denote an overlapped Schatten sup-norm as

$$\|X\|_{s,\infty} := \max_k \max_r \sigma_r(X_{(k)}).$$

With the norm, we introduce a following Lemma.

**Lemma 7.** (Lemma 1 in Tomioka et al. (2011)) For  $X \in \mathcal{X}$ , consider the infimum of the maximum mode- $k$  spectral norm for  $\|\cdot\|_{s^*}$  as

$$\|X\|_{s^*} = \inf_{\frac{1}{K} \sum_{k=1}^K Y^{(k)} = X} \max_k \|Y^{(k)}\|_{s,\infty},$$

where  $Y^{(k)} \in \mathcal{X}$  and  $Y_{(k)}^{(k)}$  is the mode- $k$  unfolding of  $Y^{(k)}$  for all  $k$ . Then,  $\|\cdot\|_{s^*}$  is the dual norm of the overlapped Schatten 1-norm  $\|\cdot\|_s$ . Moreover, the following inequality is valid:

$$\|X\|_{s^*} \leq \|X\|_m.$$

Proof is provided in Tomioka et al. (2011). By Lemma 7, we obtain the following Holder-type inequality as

$$|\langle X, X' \rangle| \leq \|X\|_s \|X'\|_{s^*} \leq \|X\|_s \|X'\|_m. \quad (13)$$

We also discuss a rank restriction for tensor and provide Lemma for the restriction.

We introduce another result to bound the the effect of the noise tensor such as  $\|\mathfrak{X}^*(\mathcal{E})\|_m$ .

**Lemma 8.** (Lemma 3 in Tomioka et al. (2011)) Let  $\mathfrak{X}$  and  $\mathcal{E}$  be as the defined above. Then, with high probability, we have

$$\|\mathfrak{X}^*(\mathcal{E})\|_m \leq \frac{\sigma}{K} \sum_{k=1}^K \left( \sqrt{I_k} + \sqrt{I_{\setminus k}} \right).$$

### A.2. Proof of Lemma 2

The notation  $\lesssim$  denotes that the left-hand side is bounded by the right-hand side up to a constant. Also, by the setting of the basis functions, we define a finite positive constant  $C_P$  satisfying  $C_P \geq \|W\|_F / \|X\|_F$ .

By the definition of  $\hat{X}$ , we obtain the following basis inequality:

$$\begin{aligned} & \frac{1}{2n} \|Y - \mathfrak{X}(\hat{X})\|^2 + \lambda_n \|W_{\hat{X}}\|_s + \mu_n \|W_{\hat{X}}\|_F \\ & \leq \frac{1}{2n} \|Y - \mathfrak{X}(X^*)\|^2 + \lambda_n \|W_{X^*}\|_s + \mu_n \|W_{X^*}\|_F. \end{aligned}$$

Let  $\Delta_X := X^* - \hat{X}$  and  $\Delta_W := W_{X^*} - W_{\hat{X}}$ , and some calculation yields

$$\begin{aligned} \frac{1}{2n} \|\mathfrak{X}(\Delta_X)\|^2 & \leq \frac{1}{n} \langle \mathcal{E}, \mathfrak{X}(\Delta_X) \rangle \\ & + \lambda_n (\|W_{\hat{X}} + \Delta_W\|_s - \|W_{\hat{X}}\|_s) \\ & + \mu_n (\|W_{\hat{X}} + \Delta_W\|_F^2 - \|W_{\hat{X}}\|_F^2). \end{aligned} \quad (14)$$

Remind that  $\mathfrak{X}$  satisfies the linearity properties.

Here, we evaluate each of the terms on the right-hand side of (14). About the first term, we obtain

$$\frac{1}{n} \langle \mathcal{E}, \mathfrak{X}(\Delta_X) \rangle = \frac{1}{n} \langle \mathfrak{X}^*(\mathcal{E}), \Delta \rangle$$

$$\leq \frac{1}{n} \|\mathfrak{X}^*(\mathcal{E})\|_{s^*} \|\Delta_X\|_s \leq \frac{1}{n} \|\mathfrak{X}^*(\mathcal{E})\|_m \|\Delta_X\|_s.$$

by the definition of adjoint operators, the Holder's inequality, and Lemma 7. Let  $\lambda^* = \frac{1}{n} \|\mathfrak{X}^*(\mathcal{E})\|_m$  for brevity. Here, we discuss the relation between  $\Delta_{X,(k)}$  and  $\Delta_{W,(k)}$ .

Also, using the setting on  $\Phi$  and the Holder's inequality, we have

$$\|\Delta_X\|_s = \frac{1}{K} \sum_{k=1}^K \|\Delta_{X,(k)}\|_s \quad (15)$$

$$\leq \frac{1}{K} \sum_{k=1}^K \|\Gamma_{(k)}\| \|\Delta_{W,(k)}\|$$

$$\leq \|\Delta_W\|_F \frac{1}{K} \sum_{k=1}^K \|\Gamma_{(k)}\|$$

$$=: \|\Delta_W\|_F C_\Gamma. \quad (16)$$

About the third term in (14), since we have we have

$$\lambda_n (\|W_{\hat{X}} + \Delta_X\|_s - \|W_{\hat{X}}\|_s) \leq \lambda_n \|\Delta_W\|_s,$$

by the triangle inequality. The third term in (14) is bounded as

$$\begin{aligned} & \mu_n (\|W_{X^*}\|_F^2 - \|W_{\hat{X}}\|_F^2) \\ &= \frac{\mu_n}{K} \left( \sum_{k=1}^K \sum_{m_k=1}^{\infty} (w_{m_1 \dots m_K}^*)^2 - \sum_{k=1}^K \sum_{m_k=1}^{M^{(k)}} \hat{w}_{m_1 \dots m_K}^2 \right) \\ &= \frac{\mu_n}{K} \left( \sum_{k=1}^K \sum_{m=1}^{M^{(k)}} \left\{ (w_{m_1 \dots m_K}^*)^2 - \hat{w}_{m_1 \dots m_K}^2 \right\} + \sum_{k=1}^K \sum_{m_k > M^{(k)}} (w_{m_1 \dots m_K}^*)^2 \right). \end{aligned}$$

Here, we let  $A := \frac{1}{K} \sum_{k=1}^K \sum_{m_k > M^{(k)}} (w_{m_1 \dots m_K}^*)^2$  for brevity. To bound the term  $\sum_{k=1}^K \sum_{m=1}^{M^{(k)}} \left\{ (w_{m_1 \dots m_K}^*)^2 - \hat{w}_{m_1 \dots m_K}^2 \right\}$ , we define a projection  $\Pi : \mathbb{R}^{M^{(1)} \times \dots \times M^{(K)}} \rightarrow \Theta$  is smooth and low-rank, and let  $\bar{\Delta}_W := \Pi(W_{X^*}) - W_{\hat{X}}$ . Then, we have

$$\begin{aligned} & \frac{1}{K} \sum_{k=1}^K \sum_{m=1}^{M^{(k)}} \left\{ (w_{m_1 \dots m_K}^*)^2 - \hat{w}_{m_1 \dots m_K}^2 \right\} \\ &= \|\Pi(W_{X^*})\|^2 - \|W_{\hat{X}}\|^2 \\ &= \|W_{\hat{X}}^2 + \bar{\Delta}_W\|^2 - \|W_{\hat{X}}\|_F^2 \leq \|\bar{\Delta}_W\|_F^2. \end{aligned}$$

Then we have

$$\mu_n (\|W_{X^*}\|_F^2 - \|W_{\hat{X}}\|_F^2) \leq \mu_n (\|\bar{\Delta}_W\|_F^2 + A).$$

About the second term in (14), we obtain

$$\begin{aligned} & \|\Delta_W\|_s \\ & \leq \frac{1}{K} \sum_{k=1}^K \|\Delta'_{W,(k)}\|_s + \frac{1}{K} \sum_{k=1}^K \|\Delta''_{W,(k)}\|_s \\ & \leq 4 \frac{1}{K} \sum_{k=1}^K \|\Delta'_{W,(k)}\|_s + \frac{1}{K} \sum_{k=1}^K \sum_{r_k > R_k^W} \sigma_{r_k}(W_{(k)}^*), \end{aligned}$$

where the inequalities follow the same discussion with Lemma 2 in Tomioka et al. (2011) and Lemma 1 in Negahban & Wainwright (2011). Let  $B := \frac{1}{K} \sum_{k=1}^K \sum_{r_k > R_k^W} \sigma_{r_k}(W_{X^*,(k)})$  for brevity. Then, by the Holder-type inequality, we have following inequalities as

$$\begin{aligned} \|\Delta'_W\|_s &\leq \frac{1}{K} \sum_{k=1}^K \sqrt{2R_k^W} \|\Delta_{W,(k)}\|_F \\ &\leq \|\Delta_W\|_F \frac{1}{K} \sum_{k=1}^K \sqrt{2R_k^W}. \end{aligned}$$

Combining the results, we evaluate the inequality (14) as

$$\begin{aligned} &\frac{1}{2n} \|\mathfrak{X}(\Delta_X)\|^2 \\ &\leq \frac{1}{n} \|\mathfrak{X}^*(\mathcal{E})\|_m \|\Delta_X\|_s + \lambda_n \|\Delta_W\|_s + \mu_n (\|\overline{\Delta_W}\|_F^2 + A) \\ &\leq \lambda^* C'_\Gamma \|\Delta_W\|_F \\ &\quad + \lambda_n \left( \|\Delta_W\|_F \frac{1}{K} \sum_{k=1}^K \sqrt{2R_k^W} + B \right) \\ &\quad + \mu_n (\|\overline{\Delta_W}\|_F^2 + A). \end{aligned}$$

By the RSC condition and the same result in (15), we have

$$\begin{aligned} \|\Delta_X\|_F^2 &\leq \frac{1}{2n} \|\mathfrak{X}(\Delta_X)\|^2 \\ &\leq (\lambda^* C'_\Gamma + \lambda_n) \|\Delta_W\|_F \frac{1}{K} \sum_{k=1}^K \sqrt{R_k^W} + \mu_n \|\Delta_W\|_F^2 + \lambda_n B + \mu_n A \\ &\leq C_P (\lambda^* C'_\Gamma + \lambda_n) \|\Delta_X\|_F \frac{1}{K} \sum_{k=1}^K \sqrt{R_k^W} + C_P \mu_n \|\Delta_X\|_F^2 + \lambda_n B + \mu_n A. \end{aligned}$$

where  $C'_\Gamma = C_\Gamma (\frac{1}{K} \sum_{k=1}^K \sqrt{R_k^W})^{-1}$ . When  $A = 0$  and  $B = 0$ , using the condition of the constant, we have

$$\begin{aligned} &(1 - C_P \mu_n) \|\Delta_X\|_F^2 \\ &\leq \kappa_n \|\Delta_X\|_F \frac{1}{K} \sum_{k=1}^K \sqrt{R_k^W}, \end{aligned}$$

by the setting of  $\kappa_n$ . Then we have

$$\|\Delta_X\|_F \lesssim \frac{\kappa_n}{K} \sum_{k=1}^K \sqrt{R_k^W}. \quad (17)$$

Then the claim holds. □

### A.3. Proof of Lemma 4

*Proof.* This proof start from the inequality (17) used in the proof of Lemma 2. By the settings of Lemma 4, we have  $A = 0$  and  $B = 0$ . Using the setting of the basis functions, we have

$$\|\Delta_W\|_F^2 \leq C_P^2 \|\Delta_X\|_F^2. \quad (18)$$

To evaluate the convergence, we bound the following term. For all  $g \in [0, 1]^K$ , we have

$$\begin{aligned}
 & |f_{\hat{X}}(g) - f_{X^*}(g)| \\
 &= \left| \sum_{k=1}^K \sum_{m_k=1}^{M^{(k)}} (\hat{w}_{m_1 \dots m_K} - w_{m_1 \dots m_K}^*) \phi_{m_1}^{(1)}(g_1) \cdots \phi_{m_K}^{(K)}(g_K) \right| \\
 &\leq \left( \sum_{k=1}^K \sum_{m_k=1}^{M^{(k)}} (\hat{w}_{m_1 \dots m_K} - w_{m_1 \dots m_K}^*)^2 \right)^{1/2} \\
 &\quad \times \left( \sum_{k=1}^K \sum_{m_k=1}^{M^{(k)}} (\phi_{m_1}^{(1)}(g_1) \cdots \phi_{m_K}^{(K)}(g_K))^2 \right)^{1/2},
 \end{aligned}$$

by the boundedness property of  $\{\phi_m\}_m$ .

Then, we obtain

$$\sup_{g \in [0, 1]^K} |f_{\hat{X}}(g) - f_{X^*}(g)| \leq C_g \|\Delta_W\|,$$

where  $C_g$  is a positive constant. Combining the result in (18), we obtain the claim. □

#### A.4. Proof of Theorem 5 and Theorem 6

*Proof.* Using Lemma 8, we obtain the regularization parameter bounding  $\|\mathfrak{X}^*(\mathcal{E})\|_m$ . Then, we substitute the parameter into the result of Lemma 2 and 6, thus we obtain the claim. □
